## OBSERVATIONS

## Sex Differences in Insulin Dose and Postprandial Glucose as BMI Increases in Patients With Type 2 Diabetes

In a recent review by Geer and Shen (1), using the PubMed database and the references cited in these reports, men were reported to have more lean mass and women to have higher adiposity. Men were also found to have more visceral and hepatic adipose tissue, whereas women had more peripheral or subcutaneous adipose tissue. The researchers concluded that these differences, as well as differences in sex hormones and adipokines, may contribute to a more insulin-sensitive environment in women than in men. When they normalized to kilograms of lean body mass, men and women had similar resting energy expenditure, but physical energy expenditure was more closely related to percent body fat in men than in women. Greater amounts of visceral and hepatic adipose tissue, in conjunction with the lack of a possible protective effect of estrogen, may be related to higher insulin resistance in men compared with women.

However, sex-specific comparisons of efficacy and safety are rarely included in the development and reporting of clinical trials in type 2 diabetic subjects. We performed a post hoc analysis (2) and examined sex differences in efficacy and safety parameters within groups of patients on lispro mixtures twice a day ( $n = 319$ ) or three times a day ( $n = 344$ ) or three times

a day in conjunction with a basal bolus therapy using glargine as the basal insulin ( $n = 184$ ), or using NPH insulin alone ( $n = 355$ ), or glargine alone ( $n = 203$ ). An integrated database (Eli Lilly and Company) was evaluated for the clinical trials that were at least 12 weeks in duration and included only insulin-using type 2 diabetic subjects ( $\pm$  oral agents). Six such trials were identified and used for this analysis. ANOVA or ANCOVA and  $\chi^2$  tests were used to analyze continuous and categorical variables, respectively. The ANOVA or ANCOVA model included effects for baseline, sex, sulfonylurea use (when applicable), duration of diabetes, and sex by linear BMI interaction. Hypoglycemia was analyzed with a negative binomial model. The end point values were defined using the last-observation-carried-forward approach.

At end point, with increasing baseline BMI, the 2-h postprandial glucose and insulin dose were significantly different in women versus men, although change in A1C was not significantly different. Women had a lower end point 2-h postprandial glucose after lunch and dinner than men ( $8.08 \pm 0.19$  vs.  $8.66 \pm 0.18$  mmol/l,  $P = 0.028$  and  $8.55 \pm 0.21$  vs.  $9.14 \pm 0.21$  mmol/l,  $P = 0.046$ , respectively). Weight gain was also greater in women than men ( $1.45 \pm 0.23$  vs.  $0.21 \pm 0.29$  kg,  $P = 0.005$ ), while women on twice-daily lispro mixtures had less hypoglycemia ( $0.56 \pm 0.10$  vs.  $0.87 \pm 0.11$  episodes  $\cdot$   $\text{pt}^{-1} \cdot 30\text{d}^{-1}$ ,  $P = 0.035$ ; the glargine-alone group also showed this response  $1.06 \pm 0.19$  vs.  $1.64 \pm 0.21$  episodes  $\cdot$   $\text{pt}^{-1} \cdot 30\text{d}^{-1}$ ,  $P = 0.042$ ). Of note, in the basal bolus group when the thrice-daily lispro was combined with glargine, no significant differences between the sexes in any variables were observed.

In conclusion, sex differences in response to insulin therapy in type 2 dia-

betic subjects appear to exist and may have implications for the safety, efficacy, and optimal utilization of insulin therapy. Thus, sex differences should be explored and considered in future clinical trial design and analyses in diabetes (1–3).

LOIS JOVANOVIĆ, MD

From the Sansum Diabetes Research Institute, Santa Barbara, California.

Corresponding author: Lois Jovanović, ljovanovic@sansum.org.

DOI: 10.2337/dc09-1634

© 2009 by the American Diabetes Association.

Readers may use this article as long as the work is properly cited, the use is educational and not for profit, and the work is not altered. See <http://creativecommons.org/licenses/by-nc-nd/3.0/> for details.

**Acknowledgments**—L.J. has received grants for research from and is on the National Advisory Board for Eli Lilly and Company. No other potential conflicts of interest relevant to this article were reported.

The findings of this article were accepted in poster form at the 69th Scientific Sessions of the American Diabetes Association, New Orleans, Louisiana, 5–9 June 2009 and at the 45th Annual Meeting of the European Association for the Study of Diabetes, Vienna, Austria, 29 September–2 October 2009.

### References

1. Geer EB, Shen W. Gender differences in insulin resistance, body composition, and energy balance. *Gend Med* 2009;6:60–75
2. Jovanović L, Heilmann CR, Lewis MS, Lacaya LB, Peters AL, Jackson JA. Sex differences in insulin dose and postprandial glucose (PPG) as BMI increases in patients with type 2 diabetes (T2D) (Abstract). *Diabetes* 2009;58(Suppl. 1):A157
3. Ferrara CM, Goldberg AP, Nicklas BJ, Sorokin JD, Ryan AS. Sex differences in insulin action and body fat distribution in overweight and obese middle-aged and older men and women. *Appl Physiol Nutr Metab* 2008;33:784–790
